# Supplementary material
Source: publisher site journal article supplement (https://www.dovepress.com/article/266549)
Supplement: Supplementary file 1 [file get_supplementary_file.php]

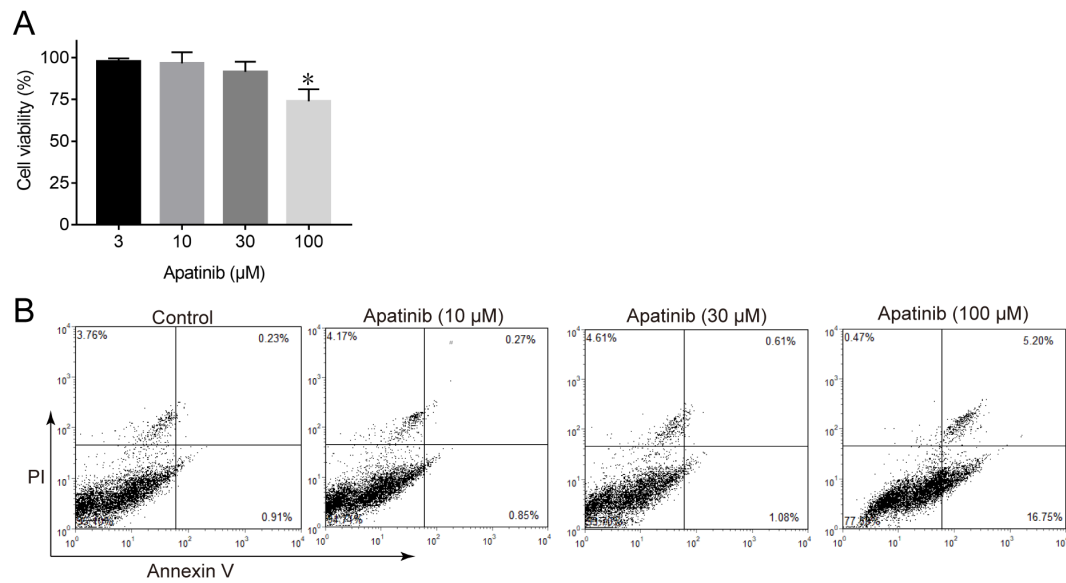

Supplementary Fig. 1 The effect of apatinib on normal colonic epithelial cell NCM460 (A) NCM460 cells were treated with indicated concentrations of apatinib for 24 h. Cell viability and cell apoptosis were tested by MTT assay (B) and Annexin V/PI stain respectively.

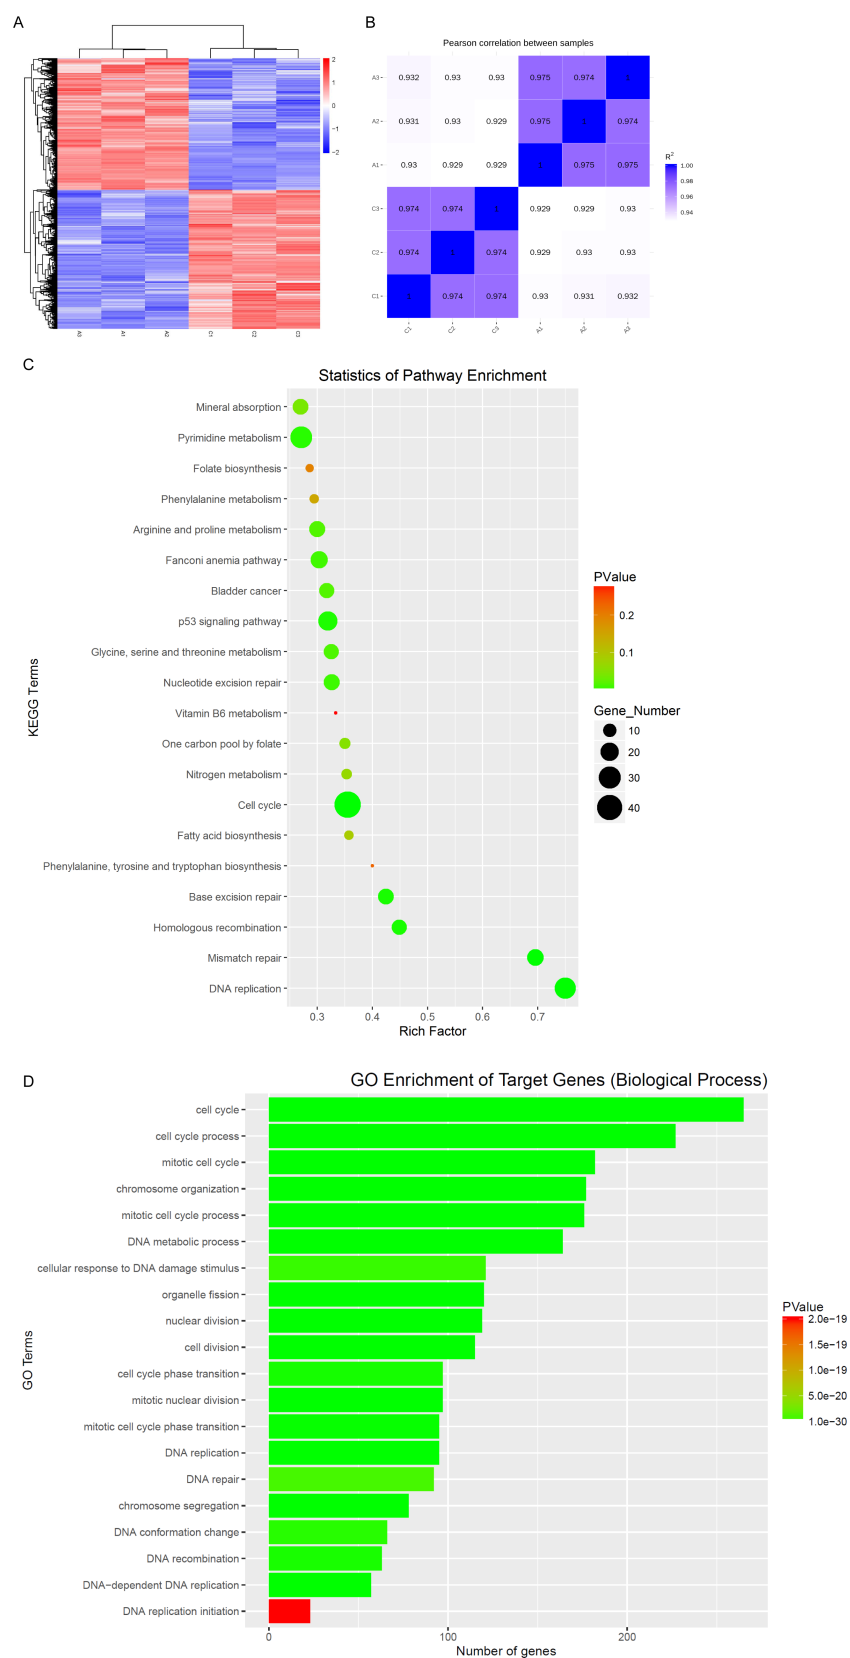

Supplementary Fig. 2 Analysis of RNA-seq data. (A, B)The QC results of RNA-seq DATA. (C, D) KEGG pathway enrichment analysis and Gene Ontology analysis of DEGs further confirmed that apatinib arrest the cell cycle of HCT116 cells.
